# Supplementary material
Source: publisher figshare collection journal article supplement (https://tandf.figshare.com/ndownloader/files/20161754)
Supplement: Supplementary file 1 [file 20161754]

**Supplementary Information**

**Contents Page No**

1. Possible antigenic sites of MurG 2
2. Possible binding sites of MurG 3
3. Multiple sequence alignment 5
4. Resolution of candidate templates 6
5. Pair-wise sequence alignment 7
6. Secondary structure of MurG 8
7. Evaluation of MurG model 9
8. Interaction of MurG with ligands 13
9. Pairwise structure alignment 21
10. Hydrophobic interaction of top four selected ligands 22

**Table 1.** The possible antigenic sites predicted using the EMBOSS-Antigenic program

| **SNo** | **Position of antigenic site** | **Antigenic site sequence** |
| --- | --- | --- |
| 1. | 264-299 | EADLIICRAGALTVTEVATAGVAAVFVPLPIAVDDH |
| 2. | 141-152 | LSRVAKVVCEAF |
| 3. | 246-255 | NLTVQVLPFI |
| 4 | 20-44 | GGHVFPALAVAKQLQQQGCQVSWLA |
| 5 | 97-136 | QLKVDAVAGFGGYVAGPGGLAARLLGIPVLIHEQNAVAGF |
| 6 | 355-362 | TQHVVDLI |
| 7 | 192-201 | PLNILIVGGS |
| 8 | 304-319 | AKFLADVGAAKICQQS |
| 9 | 212-244 | PPALKQLEVPLNIFHQCGQQQVEATQALYADAP |
| 10 | 75-88 | IRKLAAPFKILKAT |
| 11 | 159-166 | SEKVVTTG |
| 12 | 323-332 | PEVLNQLFTT |
| 13 | 59-68 | IPIYQIDIQG |
| 14 | 174-180 | TDILSPK |

**Table 2.** Binding site prediction of MurG using different types of prediction tools

| **Estimated binding site using CASTp** | **Estimated binding site using PockDrug** | **Estimated binding site using CavitypPlus** | **Estimated binding site using 3DLigandSite** | **Common binding site** |
| --- | --- | --- | --- | --- |
| Gly18, Ser201 | Gly20 | Gly18, Gly199 | Thr19 | Gly20 |
| Thr19, Leu202 | Ile255 | Thr19, Gly200 | Gly20 | Arg170 |
| Gly20, Gly203 | Arg170 | Gly20, Ser201 | Gly21 | Gly200 |
| Gly21, Gln227 | Ile173 | Gly21, Leu202 | His22 | Ser201 |
| His22, Gln230 | Val198 | His22, Gly203 | Arg170 | Gln227 |
| Val23, Phe254 | Gly200 | Val23, Ala204 | Gly200 | Phe254 |
| Phe24, Ile255 | Ser201 | Phe24, Gln227 | Ser201 | Leu275 |
| Leu27, Glu256 | Gln227 | Pro25, Gly229 | Gln227 | Thr276 |
| Ala28, Met258 | Phe254 | Leu27, Gln230 | Phe254 | Glu279 |
| Lys31, Tyr262 | Met258 | Ala28, Pro253 | Gly273 |  |
| Gln32, Ile268 | Tyr262 | Val29, Phe254 | Ala274 |  |
| Gln35, Cys270 | Ile268 | Lys31, Ile255 | Leu275 |  |
| Met49, Arg271 | Cys270 | Trp42, Glu256 | Thr276 |  |
| Arg52, Gly273 | Leu275 | Met49, Asp257 | Val277 |  |
| Leu53, Ala274 | Thr276 | Glu50, Met258 | Glu279 |  |
| Asp56, Leu275 | Glu279 | Arg52, Ala259 |  |  |
| Gln57, Thr276 |  | Leu53, Tyr262 |  |  |
| Gln130, Glu279 |  | Leu54, Ile268 |  |  |
| Asn131, Thr282 |  | Asp56, Ile269 |  |  |
| Val133, Leu292 |  | Gln57, Cys270 |  |  |
| Gly135, Ile294 |  | Phe106, Arg271 |  |  |
| Thr165, His299 |  | Gly107, Ala272 |  |  |
| Asn167, Gln300 |  | Gly108, Gly273 |  |  |
| Pro168, Asn303 |  | Glu129, Ala274 |  |  |
| Val169, Arg347 |  | Gln130, Leu275 |  |  |
| Arg170, Ala350 |  | Asn131, Thr276 |  |  |
| Arg171, Gln351 |  | Val133, Val277 |  |  |
| Glu172 |  | Ala134, Thr278 |  |  |
| Ile173 |  | Gly135, Glu279 |  |  |
| Thr174 |  | Phe136, Leu292 |  |  |
| Val198 |  | Thr137, Ile294 |  |  |
| Gly199 |  | Asn138, Asp297 |  |  |
| Gly200 |  | Asn167, Asp298 |  |  |
| Gln356 |  | Pro168, His299 |  |  |
| Thr355 |  | Val169, Gln300 |  |  |
| Ala354 |  | Arg170, Asn303 |  |  |
| Asn353 |  | Arg171, Ile173 |  |  |
| Pro352 |  | Glu172, Val198 |  |  |

**Figure 1. Multiple sequence alignment**

| Reference sequence (1): MurG  Identities normalised by aligned length.  Colored by: identity |
| --- |
| cov pid  **1** **[ . . . . : . . .** **80**  1 MurG 100.0% 100.0%  **MTDSQQSKPKHVMMMAAGTGGHVFPALAVAKQLQQQGCQVSWLATPTGMENRLLKDQNIPIYQIDIQG------VRGNGV**  2 3S2U 95.3% 46.6%  **M-------KGNVLIMAGGTGGHVFPALACAREFQARGYAVHWLGTPRGIENDLVPKAGLPLHLIQVSG------LRGKGL**  3 1F0K 96.4% 41.4%  **M---MSGQGKRLMVMAGGTGGHVFPGLAVAHHLMAQGWQVRWLGTADRMEADLVPKHGIEIDFIRISG------LRGKGI**  4 2IYF 95.3% 18.5%  **MT--TQTTPAHIAMFSIAAHGHVNPSLEVIRELVARGHRVTYAIPPVFADKVAATGPRPVLYHSTLPGPDADPEAWGSTL**  5 4M83 95.3% 18.5%  **MT--TQTTPAHIAMFSIAAHGHVNPSLEVIRELVARGHRVTYAIPPVFADKVAATGARPVLYHSTLPGPDADPEAWGSTL**  cov pid  **81**  **. 1 . . . . : .** **160**  1 MurG 100.0% 100.0%  **IRKLAAPFKILKATFSAMRYMKQLKVDAV--AGFGGYVAGPGGLAARLLGIPVLIHEQNAVA--GFTNAQLSRVAKVVCE**  2 3S2U 95.3% 46.6%  **KSLVKAPLELLKSLFQALRVIRQLRPVCV--LGLGGYVTGPGGLAARLNGVPLVIHEQNAVA--GTANRSLAPIARRVCE**  3 1F0K 96.4% 41.4%  **KALIAAPLRIFNAWRQARAIMKAYKPDVV--LGMGGYVSGPGGLAAWSLGIPVVLHEQNGIA--GLTNKWLAKIATKVMQ**  4 2IYF 95.3% 18.5%  **LDNVE-PF--LNDAIQALPQLADAYADDIPDLVLHDITSYPARVLARRWGVPAVSLSPNLVAWKGYEEEVAEPMWREPRQ**  5 4M83 95.3% 18.5%  **LDNVE-PF--LNDAIQALPQLADAYADDIPDLVLHDITSYPARVLARRWGVPAVSLSPNLVAWKGYEEEVAEPMWREPRQ**  cov pid **161**  **. . . 2 . . . .** **240**  1 MurG 100.0% 100.0%  **A---------------------FPNTFPASEKVVTTGNP---------VRREITDILSPKWRYDEREQA------GKPLN**  2 3S2U 95.3% 46.6%  **A---------------------FPDTFPASDKRLTTGNP---------VRGELF--------LDAHARA---PLTGRRVN**  3 1F0K 96.4% 41.4%  **A---------------------FPGAFPNAE---VVGNP---------VRTDVLALPLPQQRLAGREGP---------VR**  4 2IYF 95.3% 18.5%  **TERGRAYYARFEAWLKENGITEHPDTFASHPPRSLVLIPKALQPHADRVDEDVYTFVGACQGDRAEEGGWQRP-AGAEKV**  5 4M83 95.3% 18.5%  **TERGRAYYARFEAWLKENGITEHPDTFASHPPRSLVLIPKALQPHADRVDEDVYTFVGACQGDRAEEGGWQRP-AGAEKV**  cov pid **241**  **: . . . . 3 . .** **320**  1 MurG 100.0% 100.0%  **ILIVGGSLGAKALNERLPPALKQ--LEVPLNI--FHQCGQQQVEATQALYADAPANLTVQVLPFIEDMAKAYSEADLIIC**  2 3S2U 95.3% 46.6%  **LLVLGGSLGAEPLNKLLPEALAQVPLEIRPAI--RHQAGRQHAEITAERYRTVA--VEADVAPFISDMAAAYAWADLVIC**  3 1F0K 96.4% 41.4%  **VLVVGGSQGARILNQTMPQVAAK--LGDSVTI--WHQSGKGSQQSVEQAYAEAG-QPQHKVTEFIDDMAAAYAWADVVVC**  4 2IYF 95.3% 18.5%  **VLV---SLGSAFTKQ--PAFYREC-VRAFGNLPGWHLVLQIGRKVTPAELGELP--DNVEVHDWVPQLA-ILRQADLFVT**  5 4M83 95.3% 18.5%  **VLV---SLGSAFTKQ--PAFYREC-VRAFGNLPGWHLVLQIGRKVTPAELGELP--DNVEVHDWVPQLA-ILRQADLFVT**  cov pid **321**  **. . : . . . . 4** **400**  1 MurG 100.0% 100.0%  **RAGALTVTEVATAGVAAVFVPLPIAVDDHQTANAKFLADVGAAKICQQSTMTPEVL-NQLFTTLMNRQLLTEMAVKARQH**  2 3S2U 95.3% 46.6%  **RAGALTVSELTAAGLPAFLVPLPHAIDDHQTRNAEFLVRSGAGRLLPQKSTGAAELAAQLSEVLMHPETLRSMADQARSL**  3 1F0K 96.4% 41.4%  **RSGALTVSEIAAAGLPALFVPF-QHKDRQQYWNALPLEKAGAAKIIEQPQLSVDAVANTLAG--WSRETLLTMAERARAA**  4 2IYF 95.3% 18.5%  **HAGAGGSQEGLATATPMIAVP--QAVD--QFGNADMLQGLGVARKLATEEATADLLRETALALVDDPEVARRLRRIQAEM**  5 4M83 95.3% 18.5%  **HAGAGGSQEGLATATPMIAVP--QAVD--QFGNADMLQGLGVARKLATEEATADLLRETALALVDDPEVARRLRRIQAEM**  cov pid **401**  **. . . ]** **437**  1 MurG 100.0% 100.0%  **AQPNATQHVVDLIQKM---------------------**  2 3S2U 95.3% 46.6%  **AKPEATRTVVDACLEVARGLEHHHHHH----------**  3 1F0K 96.4% 41.4%  **SIPDATERVANEVSRVARALEHHHHHH----------**  4 2IYF 95.3% 18.5%  **AQEGGTRRAADLIEAE---LPARHERQEPVGDRPNGG**  5 4M83 95.3% 18.5%  **AQEGGTRRAADLIEAE---LPARHERQEPVGDRPNGG** |

The Multiple Sequence Alignment of MurG sequence from *A. baumannii* with the UDP-N-acetylglucosamine-N-acetylmuramyl (pentapeptide) pyrophosphoryl-undecaprenol N-acetylglucosamine transferase from *Escherichia coli* (Strain K12) (1F0K), *Pseudomonas aeruginosa* (strain ATCC 15692) (3S2U), as well as Oleandomycin glycosyltransferase from *Streptomyces antibioticus* *(*2IYF, 4M83*)*.

**Figure 2. Resolution of Candidate Templates**

Weighted pair-group average clustering based on a distance matrix:

.-------------------------------------------- 3s2uA @2.2 66.0000

|

.---------------------------------------------------------- 1f0kA @1.9 89.5000

|

| .--- 2iyfA @1.7 1.0000

| |

.------------------------------------------------------------ 4m83A @1.7

+----+----+----+----+----+----+----+----+----+----+----+----+

93.0400 77.1100 61.1800 45.2500 29.3200 13.3900 -2.5400

85.0750 69.1450 53.2150 37.2850 21.3550 5.4250

This indicated that the resolution of each template displayed during modeling by modeler

**Figure 3. Pair-wise Sequence Alignment**

#=======================================

# Aligned_sequences: 2

# 1: MurG

# 2: 1F0K

# Matrix: EBLOSUM62

# Gap_penalty: 10.0

# Extend_penalty: 0.5

# Length: 359

# Identity: 159/359 (44.3%)

# Similarity: 219/359 (61.0%)

# Gaps: 15/359 (4.2%)

# Score: 693.0

#=======================================

MurG 10 KHVMMMAAGTGGHVFPALAVAKQLQQQGCQVSWLATPTGMENRLLKDQNI 59

|.:|:||.||||||||.||||..|..||.||.||.|...||..|:....|

1F0K 7 KRLMVMAGGTGGHVFPGLAVAHHLMAQGWQVRWLGTADRMEADLVPKHGI 56

MurG 60 PIYQIDIQGVRGNGVIRKLAAPFKILKATFSAMRYMKQLKVDAVAGFGGY 109

.|..|.|.|:||.|:...:|||.:|..|...|...||..|.|.|.|.|||

1F0K 57 EIDFIRISGLRGKGIKALIAAPLRIFNAWRQARAIMKAYKPDVVLGMGGY 106

MurG 110 VAGPGGLAARLLGIPVLIHEQNAVAGFTNAQLSRVAKVVCEAFPNTFPAS 159

|:|||||||..|||||::||||.:||.||..|:::|..|.:|||..||.:

1F0K 107 VSGPGGLAAWSLGIPVVLHEQNGIAGLTNKWLAKIATKVMQAFPGAFPNA 156

MurG 160 EKVVTTGNPVRREITDILSPKWRYDEREQAGKPLNILIVGGSLGAKALNE 209

|.| |||||.::..:..|:.|...|| .|:.:|:||||.||:.||:

1F0K 157 EVV---GNPVRTDVLALPLPQQRLAGRE---GPVRVLVVGGSQGARILNQ 200

MurG 210 RLPPALKQLEVPLNIFHQCGQQQVEATQALYADA--PANLTVQVLPFIED 257

.:|....:|...:.|:||.|:...::.:..||:| |.: :|..||:|

1F0K 201 TMPQVAAKLGDSVTIWHQSGKGSQQSVEQAYAEAGQPQH---KVTEFIDD 247

MurG 258 MAKAYSEADLIICRAGALTVTEVATAGVAAVFVPLPIAVDDHQTANAKFL 307

||.||:.||:::||:|||||:|:|.||:.|:|||.. ..|..|..||..|

1F0K 248 MAAAYAWADVVVCRSGALTVSEIAAAGLPALFVPFQ-HKDRQQYWNALPL 296

MurG 308 ADVGAAKICQQSTMTPE-VLNQLFTTLMNRQLLTEMAVKARQHAQPNATQ 356

...|||||.:|..::.: |.|.| ...:|:.|..||.:||..:.|:||:

1F0K 297 EKAGAAKIIEQPQLSVDAVANTL--AGWSRETLLTMAERARAASIPDATE 344

MurG 357 HVVDLIQKM 365

.|.:.:.::

1F0K 345 RVANEVSRV 353

Pairwise sequence alignment among MurG and the UDP-N-acetylglucosamine-N-acetylmuramyl (pentapeptide) pyrophosphoryl-undecaprenol N-acetylglucosamine transferase (1F0K) from *Escherichia coli* (Strain K12) showing the conserved regions in green color.

**Figure 4. Secondary Structure of MurG**


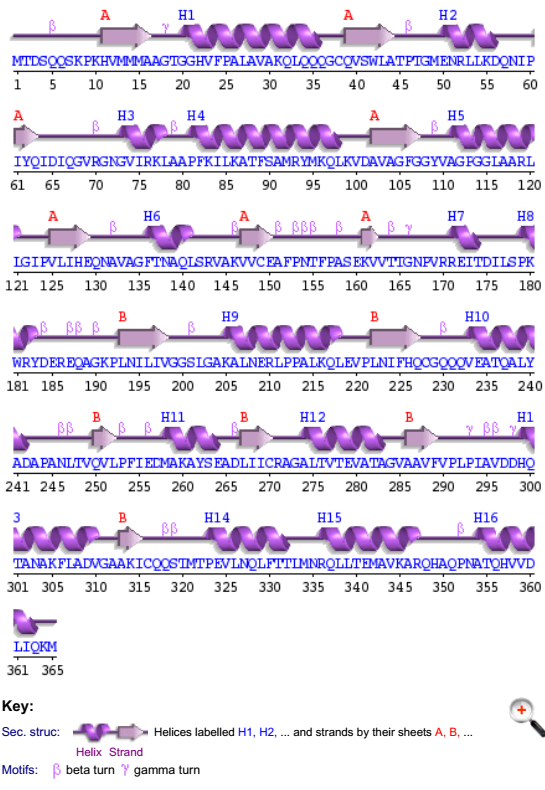


**Figure 5. Model Evaluation score of MurG**


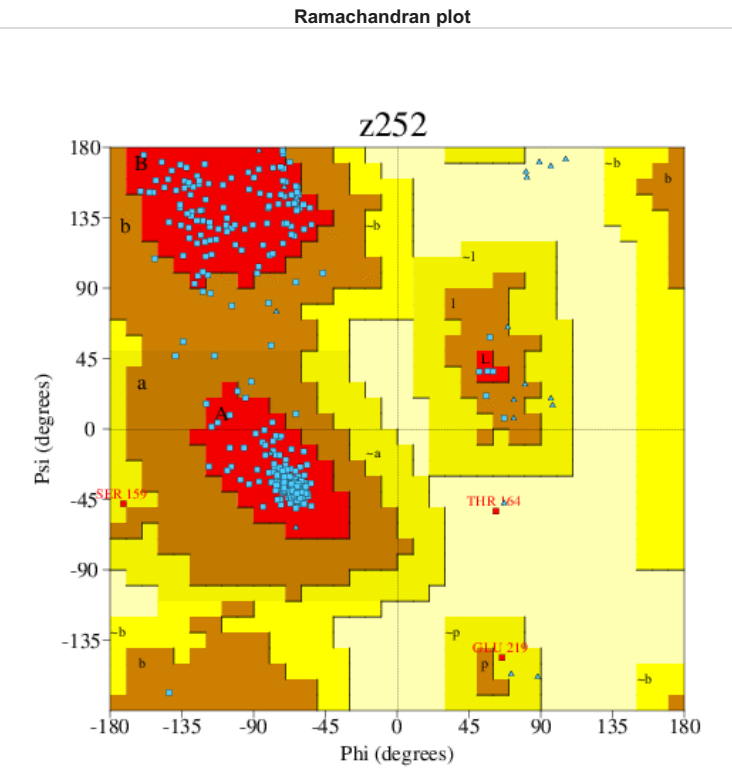


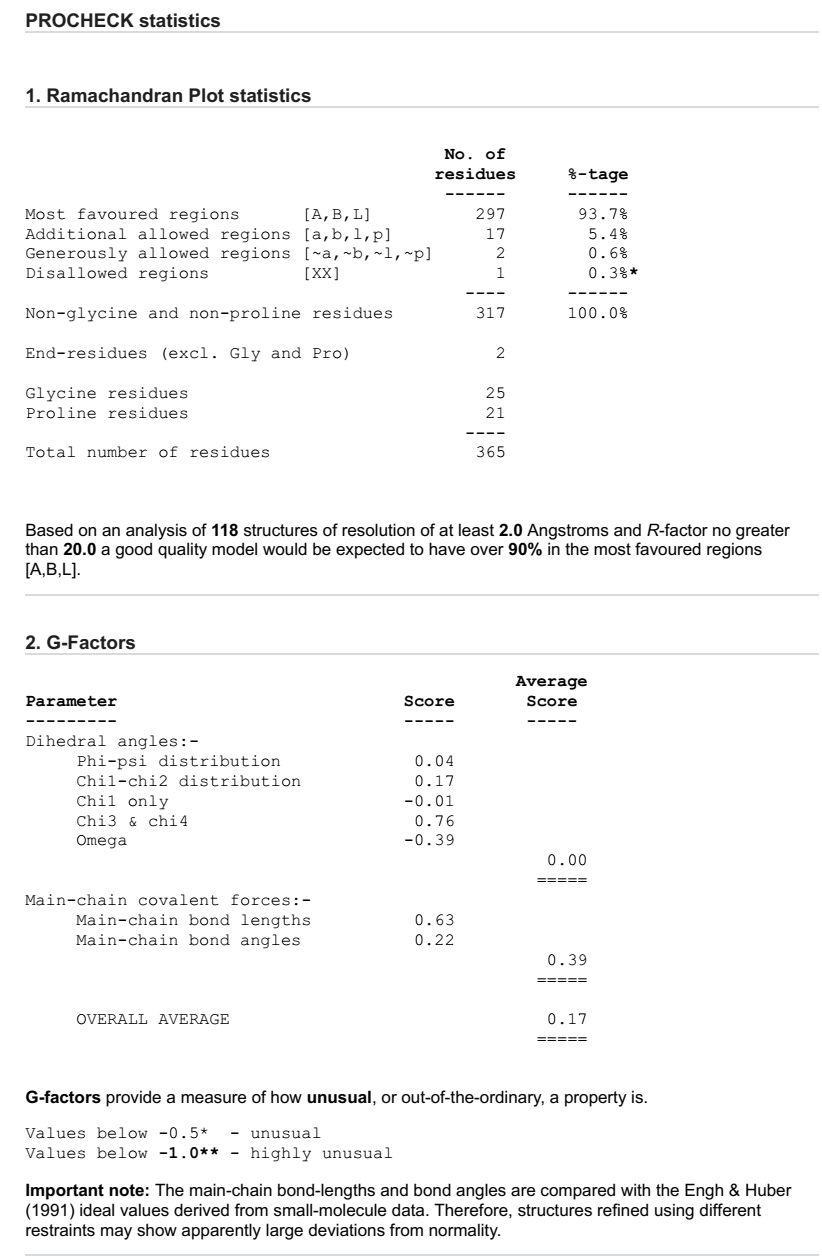


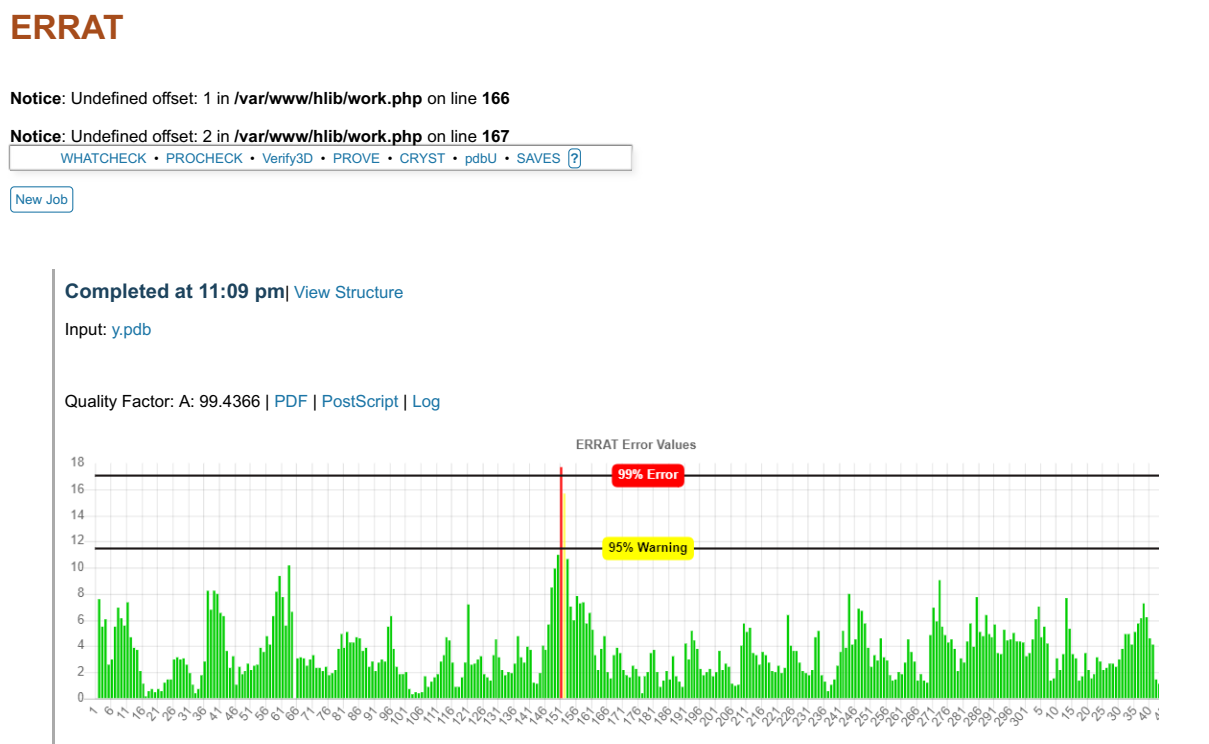


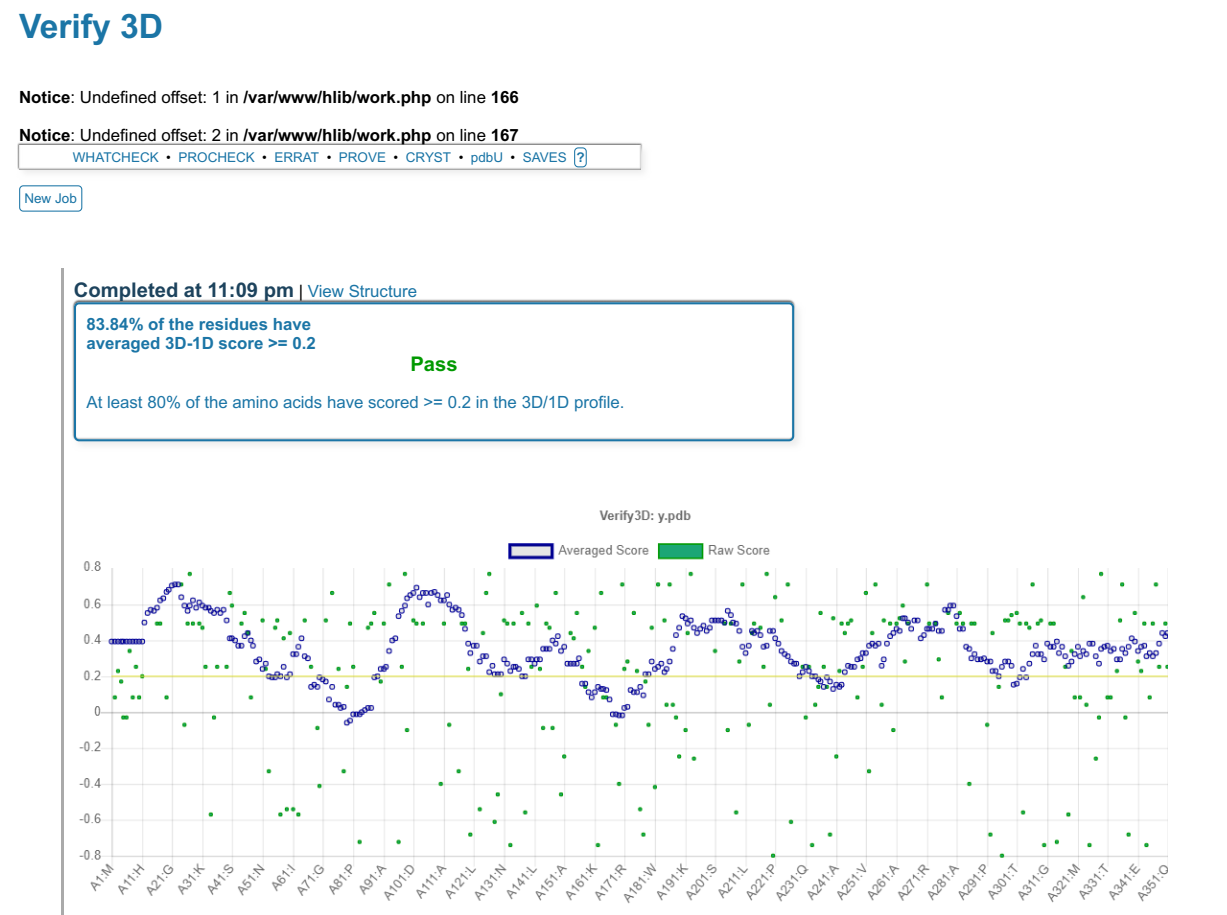


Model evaluation score of MurG structure using PROCHECK, ERRAT, and Verify_3D after energy minimization

**Figure 6. Interactions of MurG with Ligands**

(a)


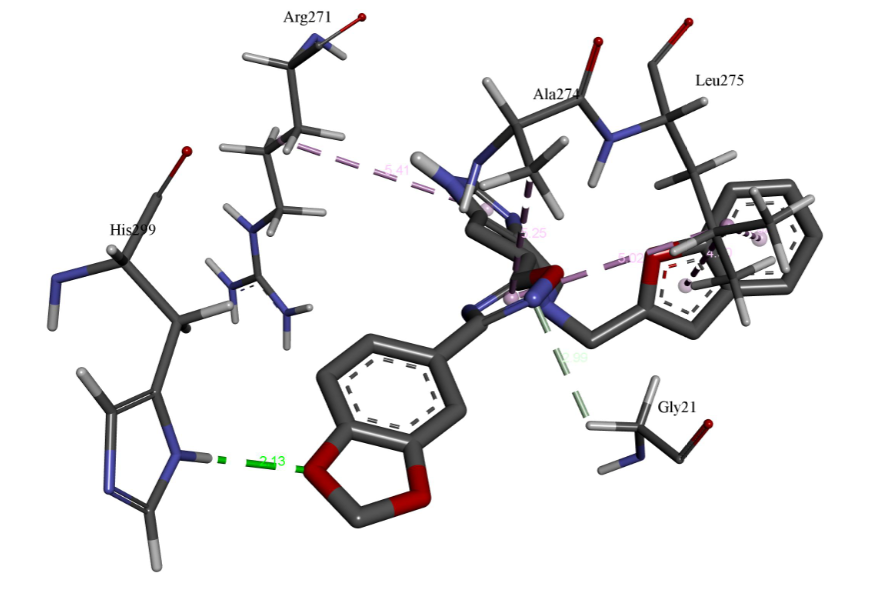


(b) (c)


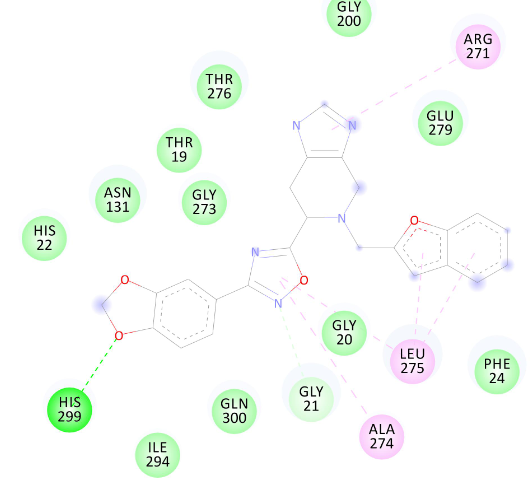

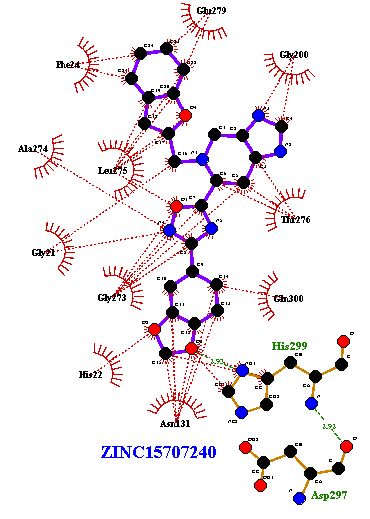


Interactions of ligand ZINC15707240 to the MurG (a) three-dimensional orientation of catalytic site residues of MurG interacting with compound ZINC15707240 (sliver) through hydrogen bond (green bond color) and pi-interaction (pinkish bond color) (b) two-dimensional representation of MurG residues (slightly green without bond formation) interacting with ligand ZINC15707240 by van der Waals interactions (c) two-dimensional representation of MurG residues (connected with red lines) interacting with ligand ZINC15707240 via hydrophobic interactions.

(a)


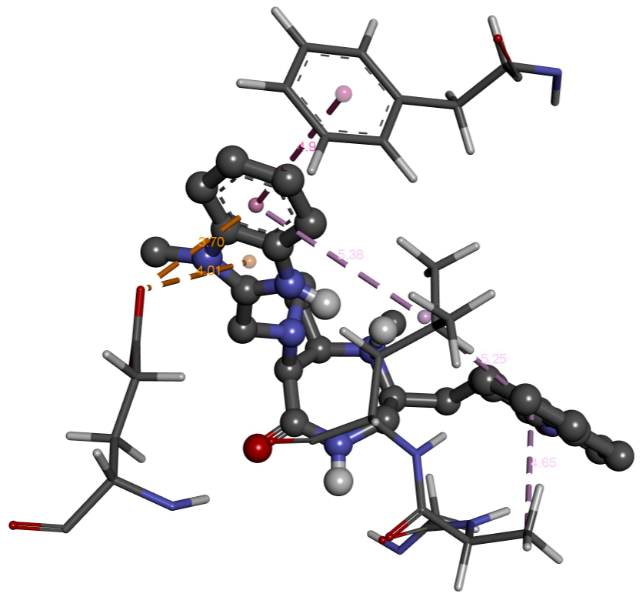


(b) (c)


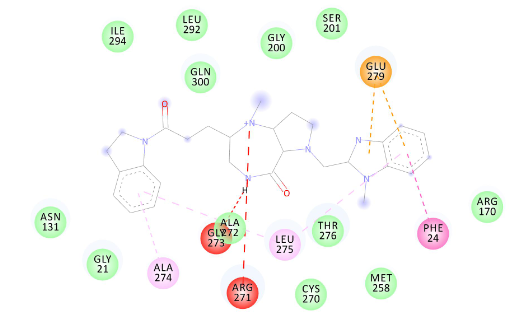

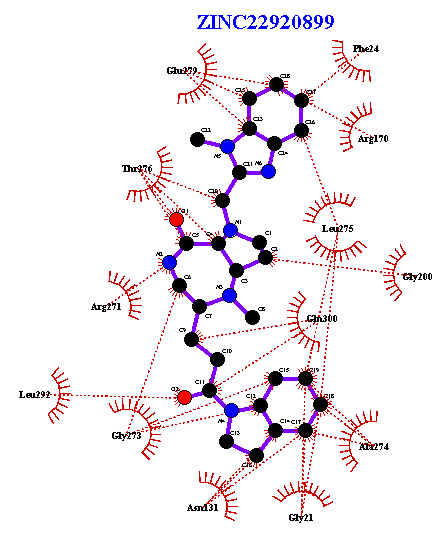


Interactions of ligand ZINC22920899 to the MurG (a) three-dimensional orientation of catalytic site residues of MurG interacting with compound ZINC22920899 (sliver) through pi-interaction (b) two-dimensional representation of MurG residues interacting with ligand ZINC22920899 dominated by van der Waals interactions (slightly green color without bond formation) (c) two-dimensional representation of MurG residues interacting with ligand ZINC22920899 via hydrophobic interactions.

(a)


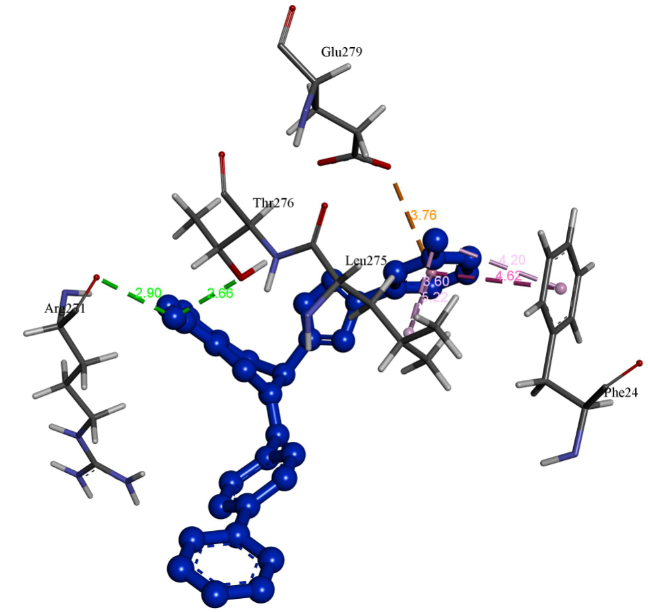


(b) (c)


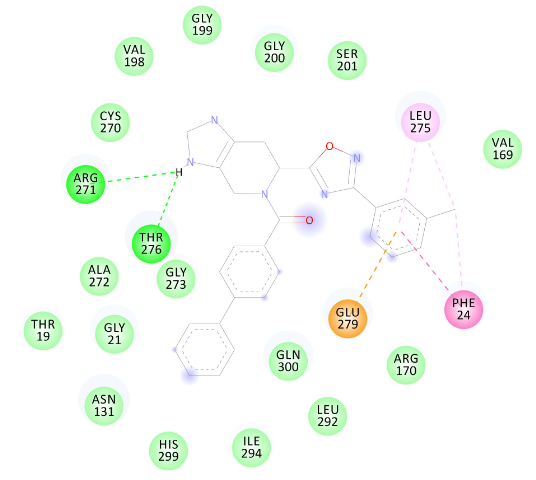

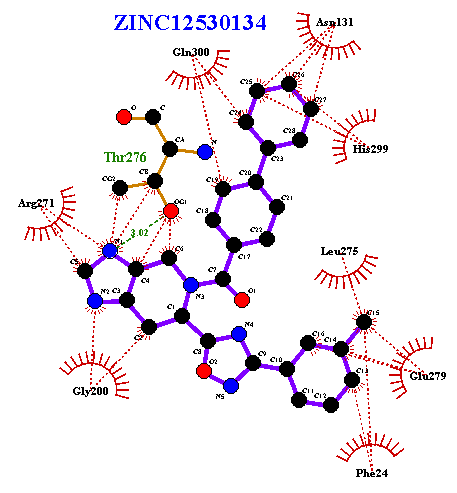


Interactions of ligand ZINC12530134 to the MurG (a) three-dimensional orientation of catalytic site residues of MurG interacting with compound ZINC12530134 (blue) through hydrogen bond (green bond color) and pi-interaction (pinkish bond color) (b) two-dimensional representation of MurG residues (slightly green color without bond formation) interacting with ligand ZINC12530134 by van der Waals interactions (c) two-dimensional representation of MurG residues (connected with red lines) interacting with ligand ZINC12530134 via hydrophobic interactions.

(a)


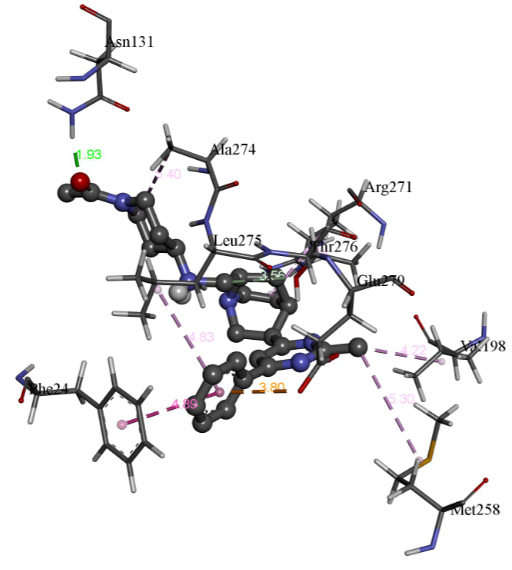


(b) (c)


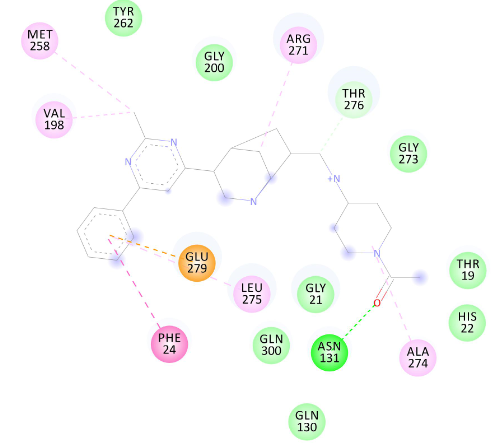

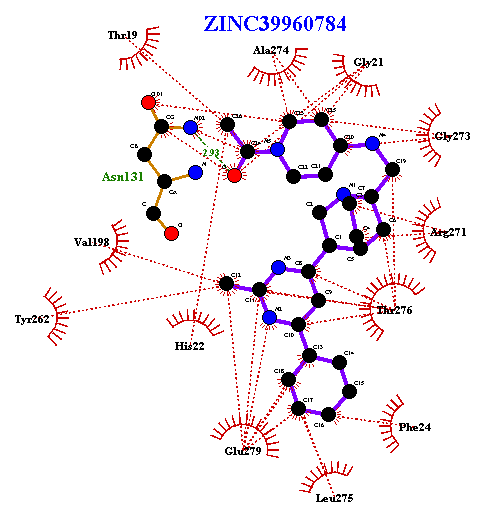


Interactions of ligand ZINC39960784 to the MurG (a) three-dimensional orientation of catalytic site residues of MurG interacting with compound ZINC39960784 (sliver) through hydrogen bond (green bond color) and pi-interaction (pinkish bond color) (b) two-dimensional representation of MurG residues (slightly green color without bond formation) interacting with ligand ZINC39960784 by van der Waals interactions (c) two-dimensional representation of MurG residues (connected with red lines) interacting with ligand ZINC39960784 via hydrophobic interactions.

(a)


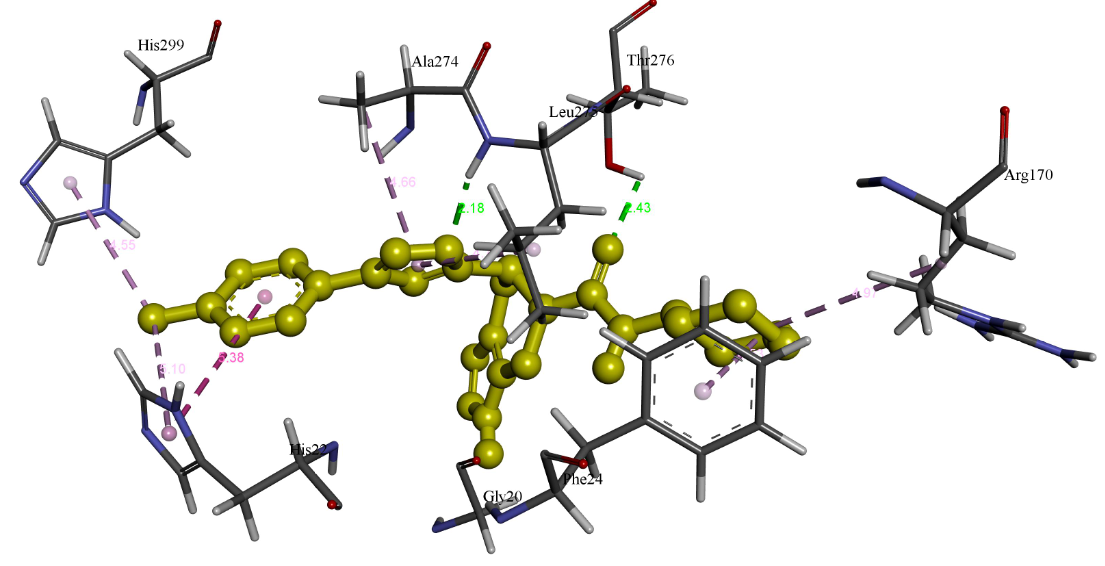


(b) (c)


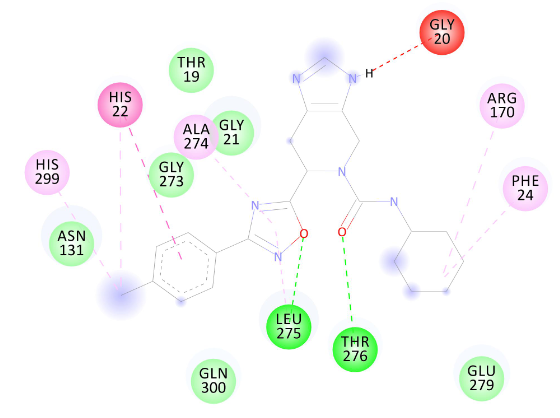

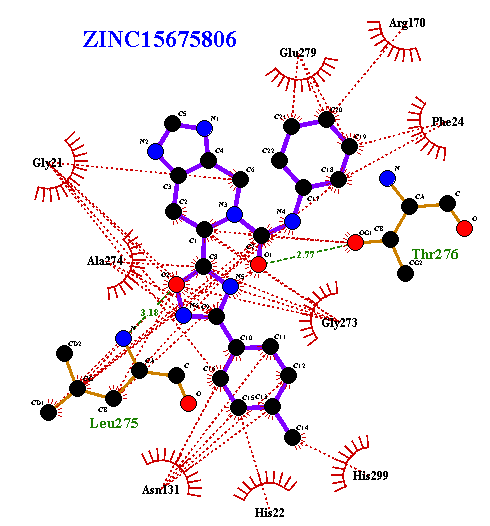


Interactions of ligand ZINC15675806 to the MurG (a) three-dimensional orientation of catalytic site residues of MurG interacting with compound ZINC15675806 (yellowish) through hydrogen bond (green bond color) and pi-interaction (pinkish bond color) (b) two-dimensional representation of MurG residues (slightly green color without bond formation) interacting with ligand ZINC15675806 by van der Waals interactions (c) two-dimensional representation of MurG residues (connected with red lines) interacting with ligand ZINC15675806 via hydrophobic interactions.

(a)


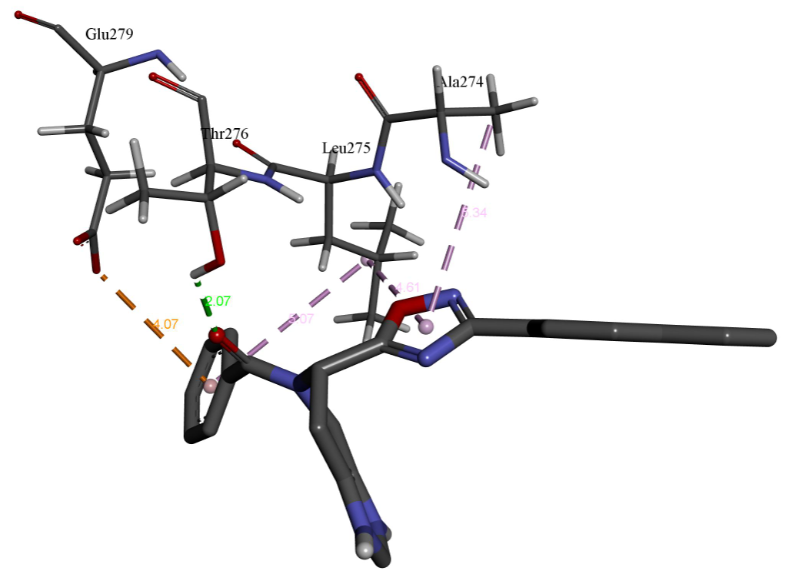


(b) (c)


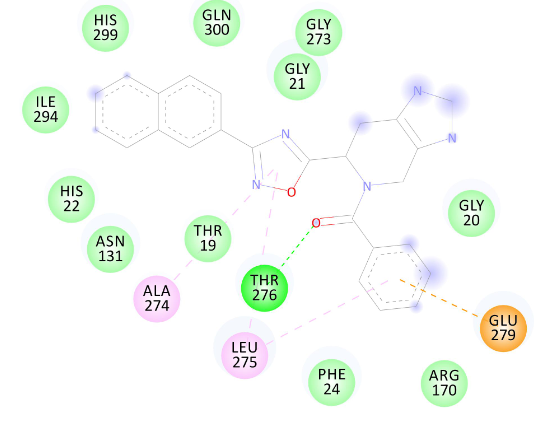

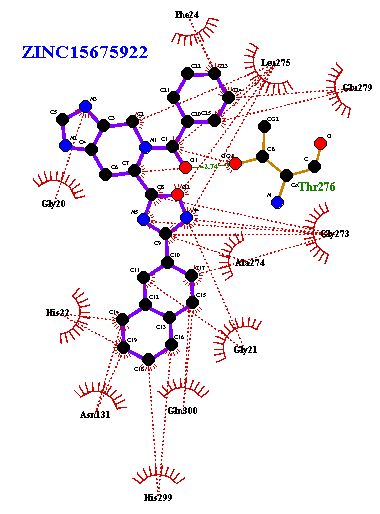


Interactions of ligand ZINC15675922 to the MurG (a) three-dimensional orientation of catalytic site residues of MurG interacting with compound ZINC15675922 (slivery) through hydrogen bond (green bond color) and pi-interaction (pinkish bond color) (b) two-dimensional representation of MurG residues (slightly green color without bond formation) interacting with ligand ZINC15675922 by van der Waals interactions (c) two-dimensional representation of MurG residues (connected with red lines) interacting with ligand ZINC15675922 via hydrophobic interactions.

(a)


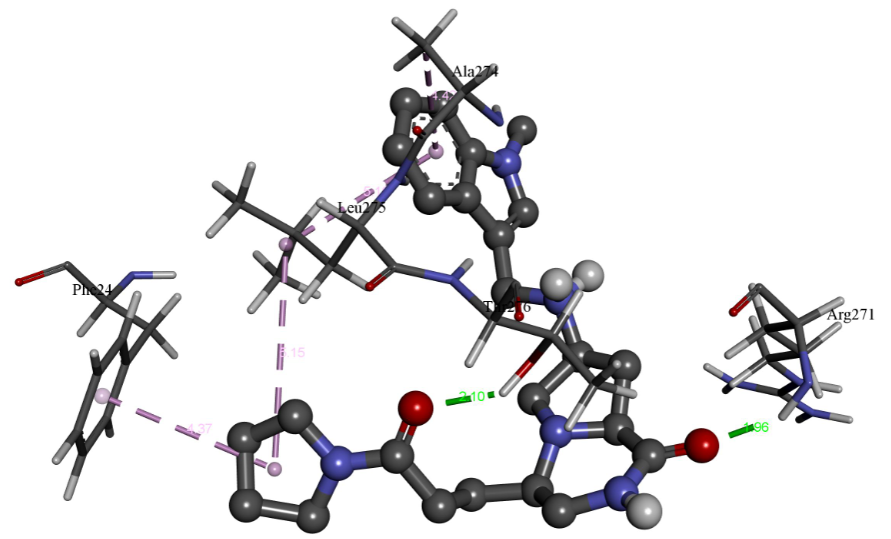


(b) (c)


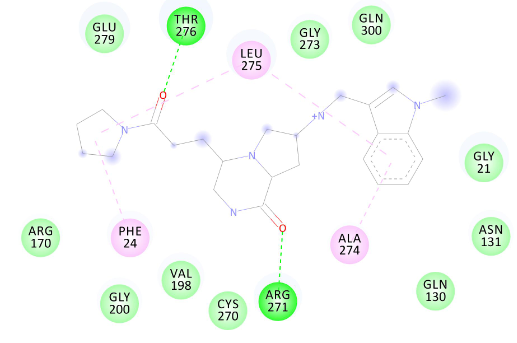

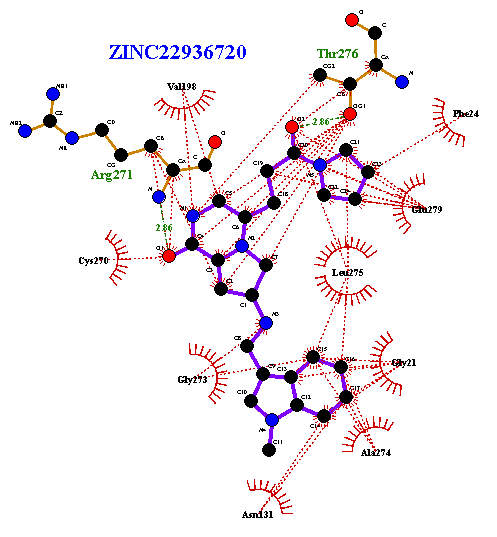


Interactions of ligand ZINC22936720 to the MurG (a) three-dimensional orientation of catalytic site residues of MurG interacting with compound ZINC22936720 (slivery) through hydrogen bond (green bond color) and pi-interaction (pinkish bond color) (b) two-dimensional representation of MurG residues (slightly green color without bond formation) interacting with ligand ZINC22936720 by van der Waals interactions (c) two-dimensional representation of MurG residues (connected with red lines) interacting with ligand ZINC22936720 via hydrophobic interactions.

(a)


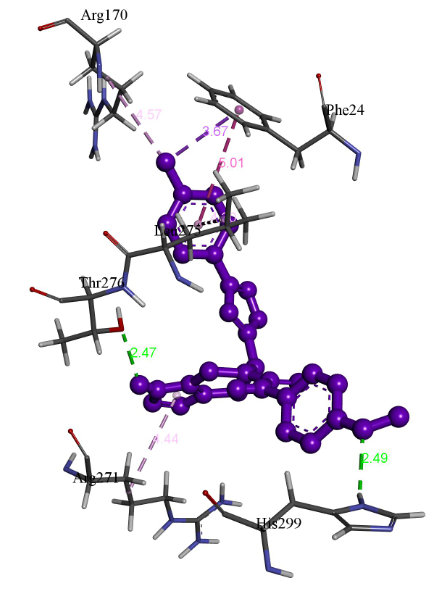


(b) (c)


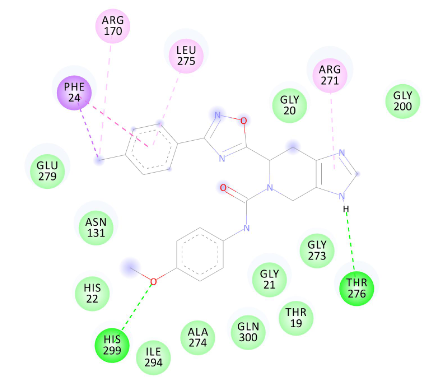

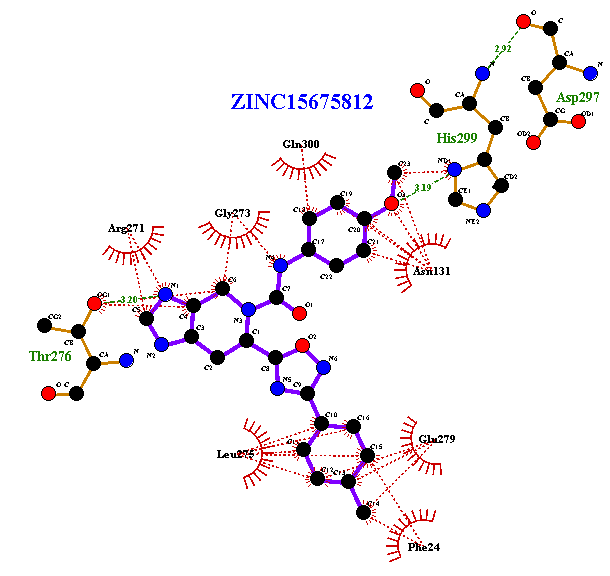


Interactions of ligand ZINC15675812 to the MurG (a) three-dimensional orientation of catalytic site residues of MurG interacting with compound ZINC15675812 (purple) through hydrogen bond (green bond color) and pi-interaction (pinkish bond color) (b) two-dimensional representation of MurG residues (slightly green color without bond formation) interacting with ligand ZINC15675812 by van der Waals interactions (c) two-dimensional representation of MurG residues (connected with red lines) interacting with ligand ZINC15675812 via hydrophobic interactions.

**Figure 7. Pairwise Structure alignment obtained from FATCAT webserver using Flexible approach.**

Align pdb1.pdb 365 with pdb2.pdb 351

P-value 0.00e+00 Afp-num 42510 Identity 43.54% Similarity 60.67%

Block 0 afp 42 score 977.92 rmsd 0.77 gap 16 (0.05%)

. : . : . : . : . : . : . :

Chain 1: 10 KHVMMMAAGTGGHVFPALAVAKQLQQQGCQVSWLATPTGMENRLLKDQNIPIYQIDIQGVRGNGVIRKLA

1111111111111111111111111111111111111111111111111111111111111111111111

Chain 2: 7 KRLMVMAGGTGGHVFPGLAVAHHLMAQGWQVRWLGTADRMEADLVPKHGIEIDFIRISGLRGKGIKALIA

. : . : . : . : . : . : . :

Chain 1: 80 APFKILKATFSAMRYMKQLKVDAVAGFGGYVAGPGGLAARLLGIPVLIHEQNAVAGFTNAQLSRVAKVVC

1111111111111111111111111111111111111111111111111111111111111111111111

Chain 2: 77 APLRIFNAWRQARAIMKAYKPDVVLGMGGYVSGPGGLAAWSLGIPVVLHEQNGIAGLTNKWLAKIATKVM

. : . : . : . : . : . : . :

Chain 1: 150 EAFPNTFPASEKVVTTGNPVRREITDILSPKWRYDEREQAGKPLNILIVGGSLGAKALNERLPPALKQLE

11111111 11111 1111111111111111111111 11111111111111111111111111111

Chain 2: 147 QAFPGAFP-NAEVV--GNPVRTDVLALPLPQQRLAGRE---GPVRVLVVGGSQGARILNQTMPQVAAKLG

. : . : . : . : . : . : . :

Chain 1: 220 VPLNIFHQCGQQQVEATQALYADAPANLTVQVLPFIEDMAKAYSEADLIICRAGALTVTEVATAGVAAVF

111111111111111111111111111 111111111111111111111111111111111111111111

Chain 2: 211 DSVTIWHQSGKGSQQSVEQAYAEAGQP-QHKVTEFIDDMAAAYAWADVVVCRSGALTVSEIAAAGLPALF

. : . : . : . : . : . : . :

Chain 1: 290 VPLPIAVDDHQTANAKFLADVGAAKICQQSTMTPEVLNQLFTTLMNRQLLTEMAVKARQHAQPNATQHVV

111111 1111111111111111111111111111111111111 1111111111111111111111111

Chain 2: 280 VPFQHK-DRQQYWNALPLEKAGAAKIIEQPQLSVDAVANTLAGW-SRETLLTMAERARAASIPDATERVA

.

Chain 1: 360 DLIQKM

111111

Chain 2: 348 NEVSRV

The pairwise structure alignment of MurG model structure and its template (1F0K) structure

**Figure 8.** **Hydrophobic interaction of top four selected ligands with MurG model structure**

a b


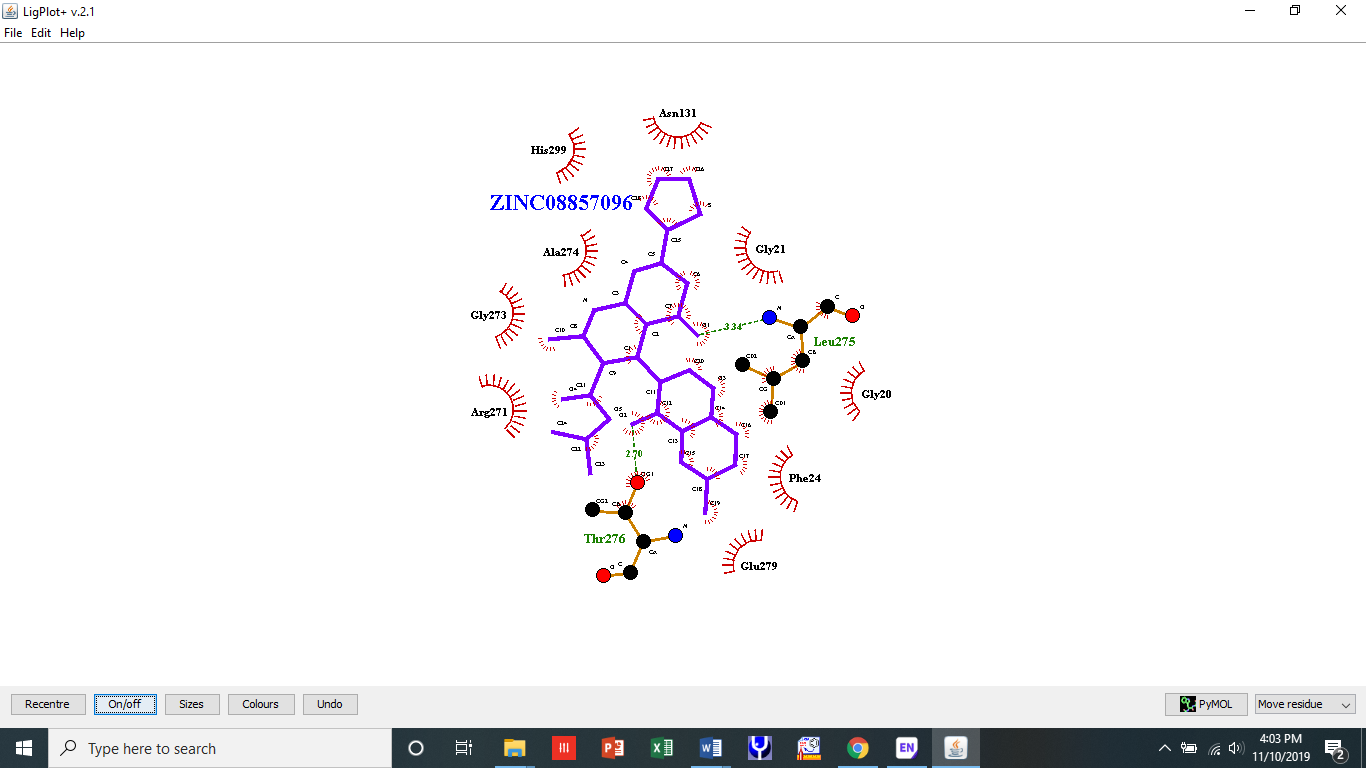

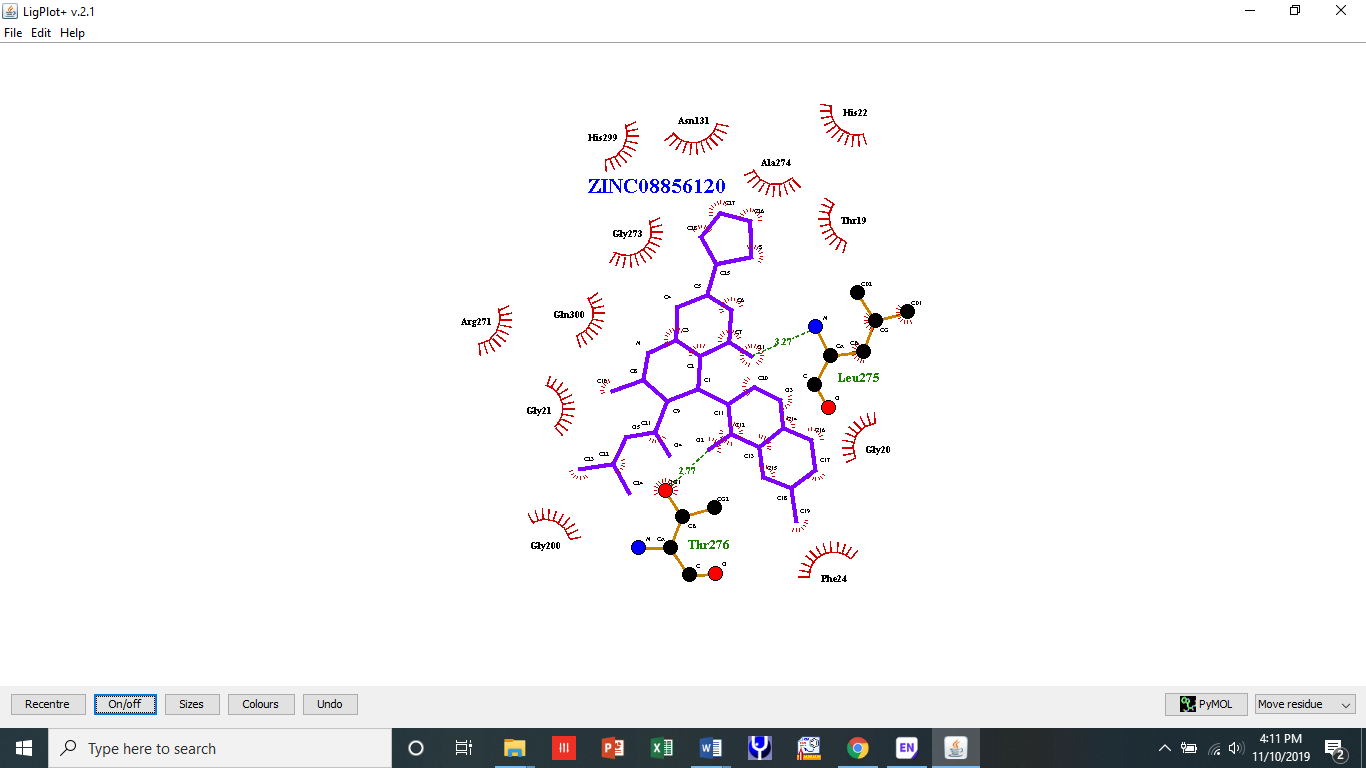


C d


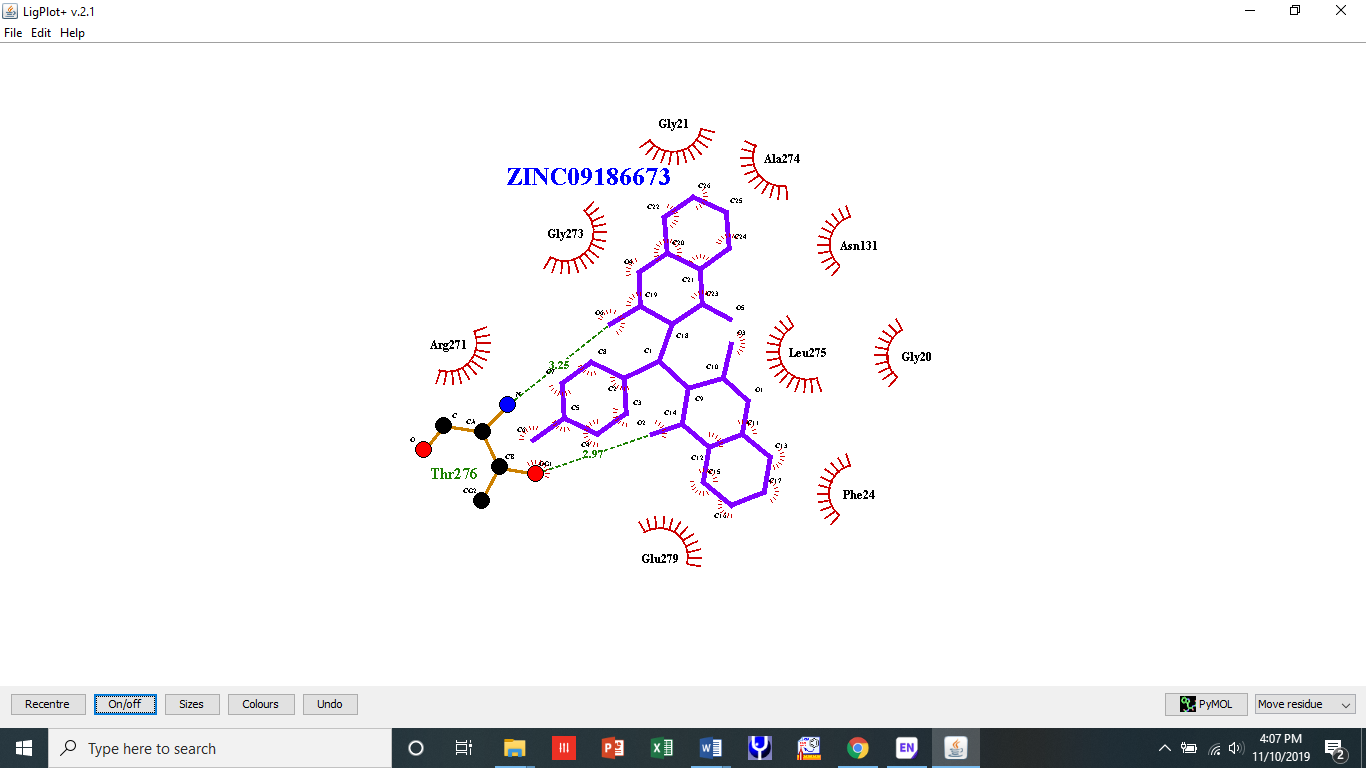

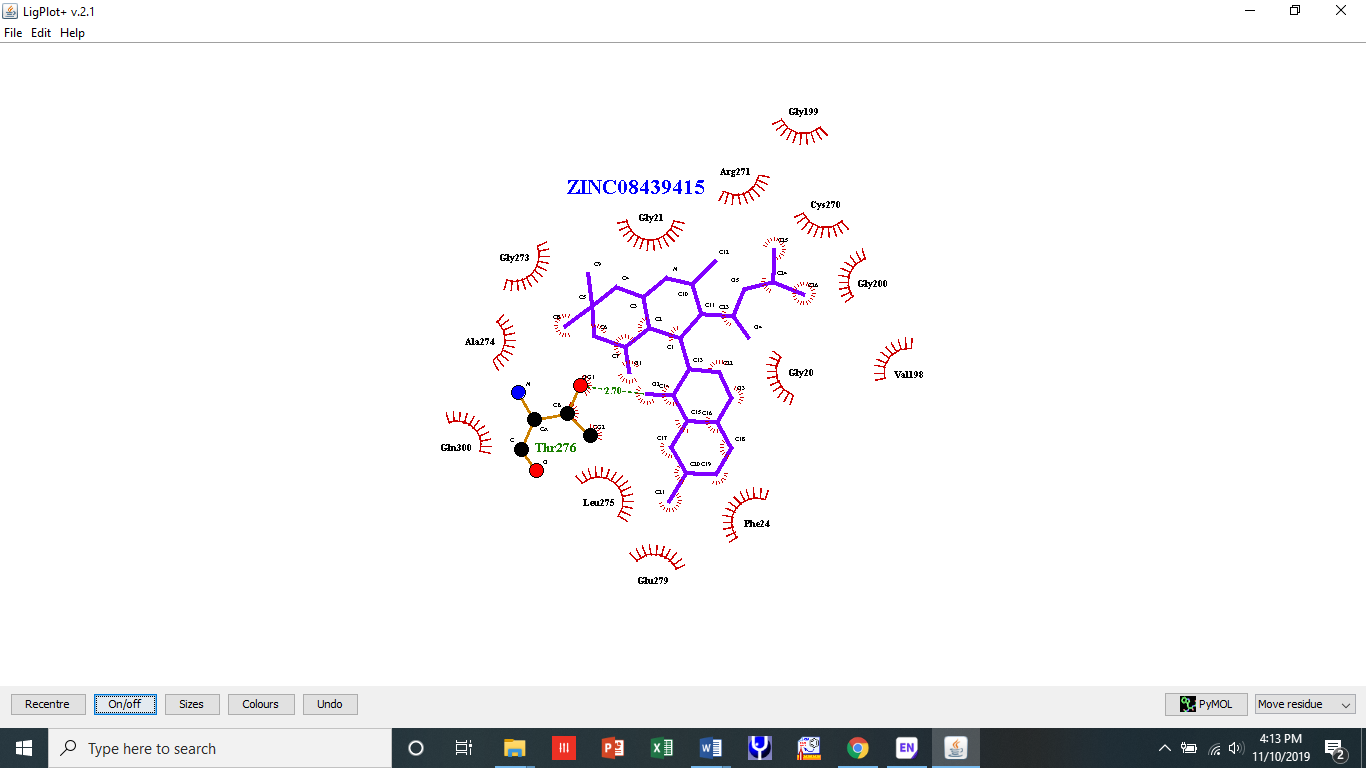


Two-dimensional representation of MurG interacting with ligand ZINC09186673, ZINC08856120, ZINC08439415 and ZINC08857096 mainly via hydrophobic interactions. Hydrophobic contacts are represented by red arc with spokes radiating towards the ligand atoms they contact. The contacted atoms are shown with spokes radiating back.
